# Supplementary material for: Effects of antineoplastic and immunomodulating agents on postvaccination SARS-CoV-2 breakthrough infections, antibody response, and serological cytokine profile
Source: PubMed Central journal article supplement — J Immunother Cancer. 2024 Jan 31;12(1):e008233. doi: 10.1136/jitc-2023-008233 (PMC10831464; doi:10.1136/jitc-2023-008233), 2024-01-31
Supplement: jitc-2023-008233supp001.pdf [file jitc-2023-008233supp001.pdf]

**SUPPLEMENTAL MATERIAL****Table of Contents**

|                                   |           |
|-----------------------------------|-----------|
| <b>Supplemental Figures</b> ..... | <b>2</b>  |
| Supplemental Figure 1.....        | 2         |
| Supplemental Figure 2.....        | 4         |
| Supplemental Figure 3.....        | 6         |
| Supplemental Figure 4.....        | 8         |
| Supplemental Figure 5.....        | 10        |
| Supplemental Figure 6.....        | 12        |
| Supplemental Figure 7.....        | 14        |
| Supplemental Figure 8.....        | 16        |
| Supplemental Figure 9.....        | 18        |
| Supplemental Figure 10.....       | 20        |
| <b>Supplemental Tables</b> .....  | <b>22</b> |
| Supplemental Table 1 .....        | 22        |
| Supplemental Table 2.....         | 23        |
| Supplemental Table 3.....         | 24        |
| Supplemental Table 4.....         | 25        |
| Supplemental Table 5.....         | 26        |
| Supplemental Table 6.....         | 27        |
| Supplemental Table 7.....         | 28        |
| Supplemental Table 8.....         | 29        |
| Supplemental Table 9.....         | 30        |
| Supplemental Table 10.....        | 31        |
| Supplemental Table 11.....        | 32        |

## Supplemental Figure 1

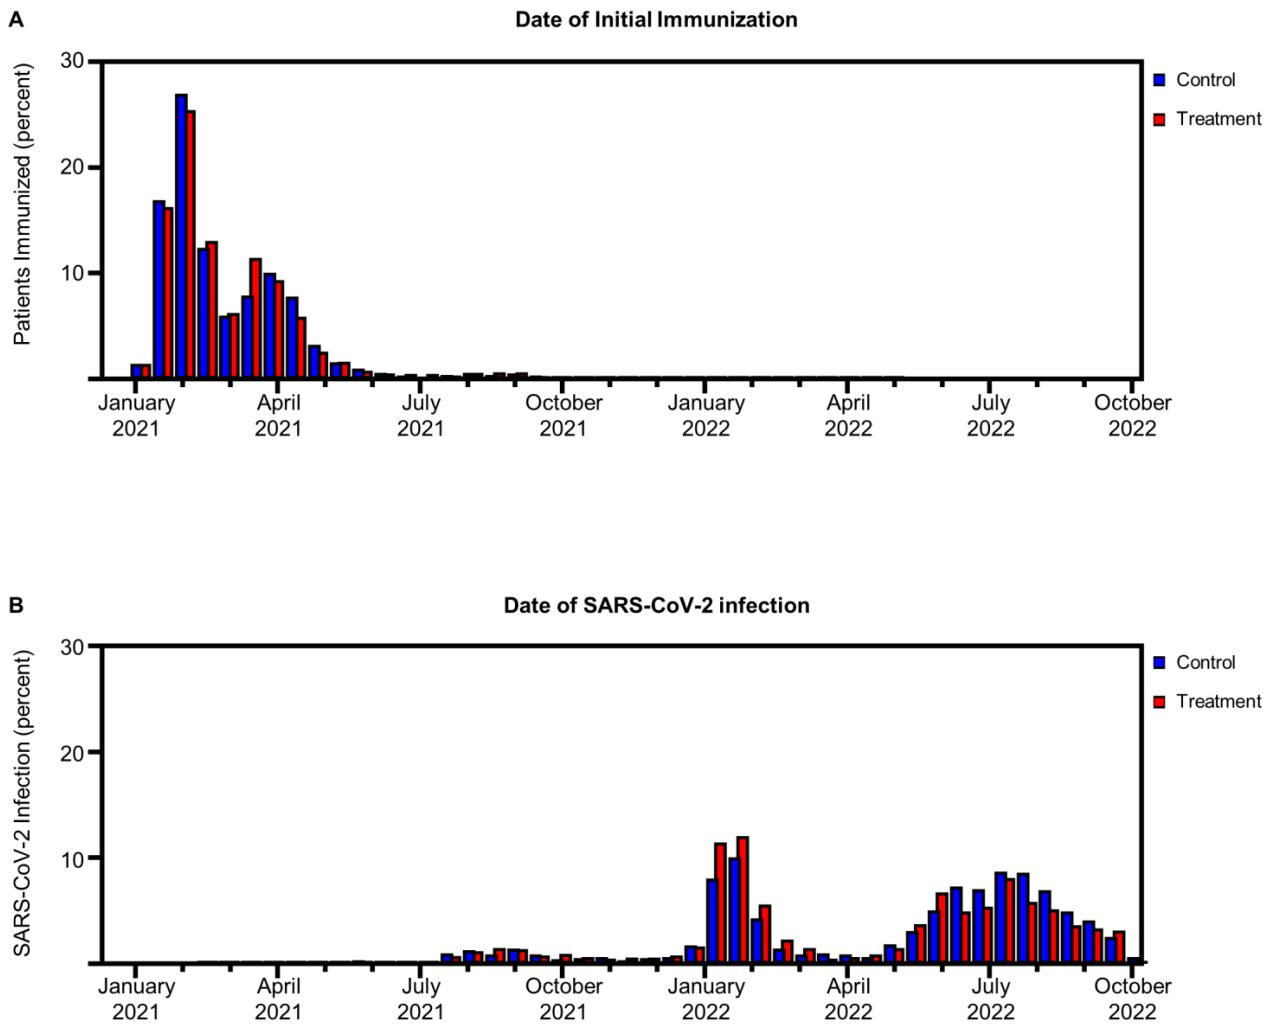

**Supplemental Figure 1. WHO ATC L medicine treated and control patients were immunized and tested positive at similar temporal pattern.**

(A) Frequency distribution of date of initial immunization of all immunosuppressed (n=13362) and matched immunocompetent (n=13362) patients.

(B) Frequency distribution of date of SARS-CoV-2 infection of all immunosuppressed (n=1334) and matched immunocompetent (n=907) patients.

**Supplemental Figure 2**

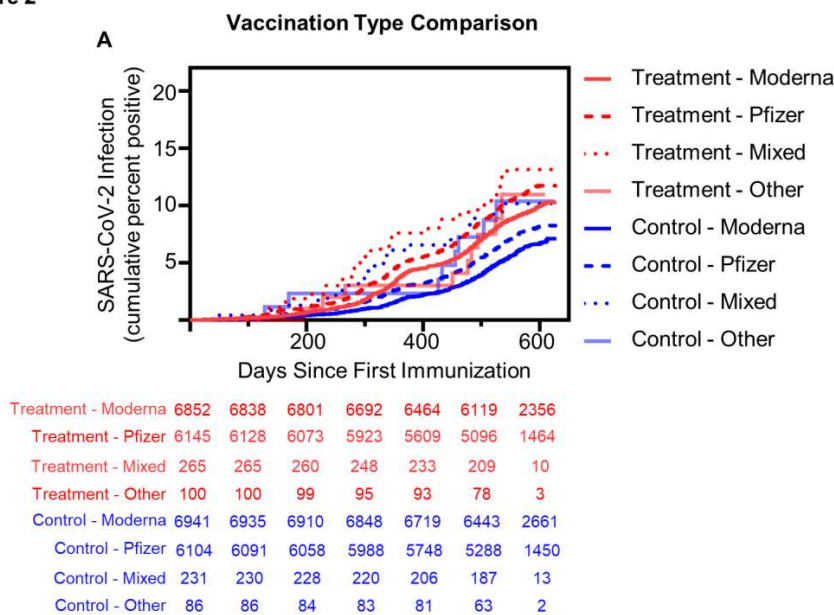

## **Supplemental Figure 2. Treated patients remained at increased risk of SARS-CoV-2 infection regardless of vaccine manufacturer.**

A) Effect of initial immunization type (first two doses) on SARS-CoV-2 infection cumulative incidence post-immunization in treated and control patients (Treated: Moderna n=6852, Pfizer n=6145, Mixed n=265, Other n=100; Control: Moderna n=6941, Pfizer n=6104, Mixed n=231, Other n=86). Mixed is defined as having one Moderna and one Pfizer immunization in the first two immunizations of COVID-19 immunization series. Other is defined as having not Moderna nor Pfizer in first two immunizations of COVID-19 immunization series (for example, Janssen).

**Supplemental Figure 3**

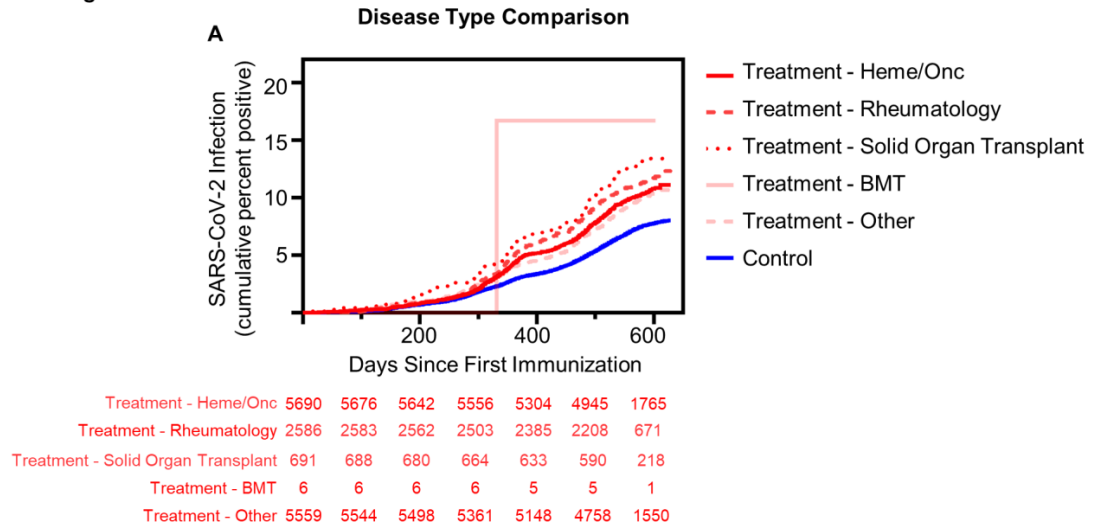

### **Supplemental Figure 3. Treated patients remained at increased risk of SARS-CoV-2 infection across immunodeficiency disease states.**

A) Effect of immunization type on SARS-CoV-2 infection cumulative incidence post-immunization in treated and control patients. Disease states were identified by the following methodology between the timeframe of July 1, 2020, through June 30, 2021 to identify patients with a disease-related encounter within 6 months of initial immunization: Hematology/oncology status was determined by cancer-related diagnostic encounters, while bone marrow transplant recipients were identified through transplant procedures. Rheumatology and solid organ transplant statuses were ascertained via respective departmental outpatient visits. Patients presenting with overlapping criteria, such as a cancer diagnosis and rheumatology visits, were recorded in multiple categories. Those treated patients not aligning with these specified categories were classified as "treatment – other." Control represents the entire population of matched, control patients not prescribed treatment medications (n=13,362).

Supplemental Figure 4

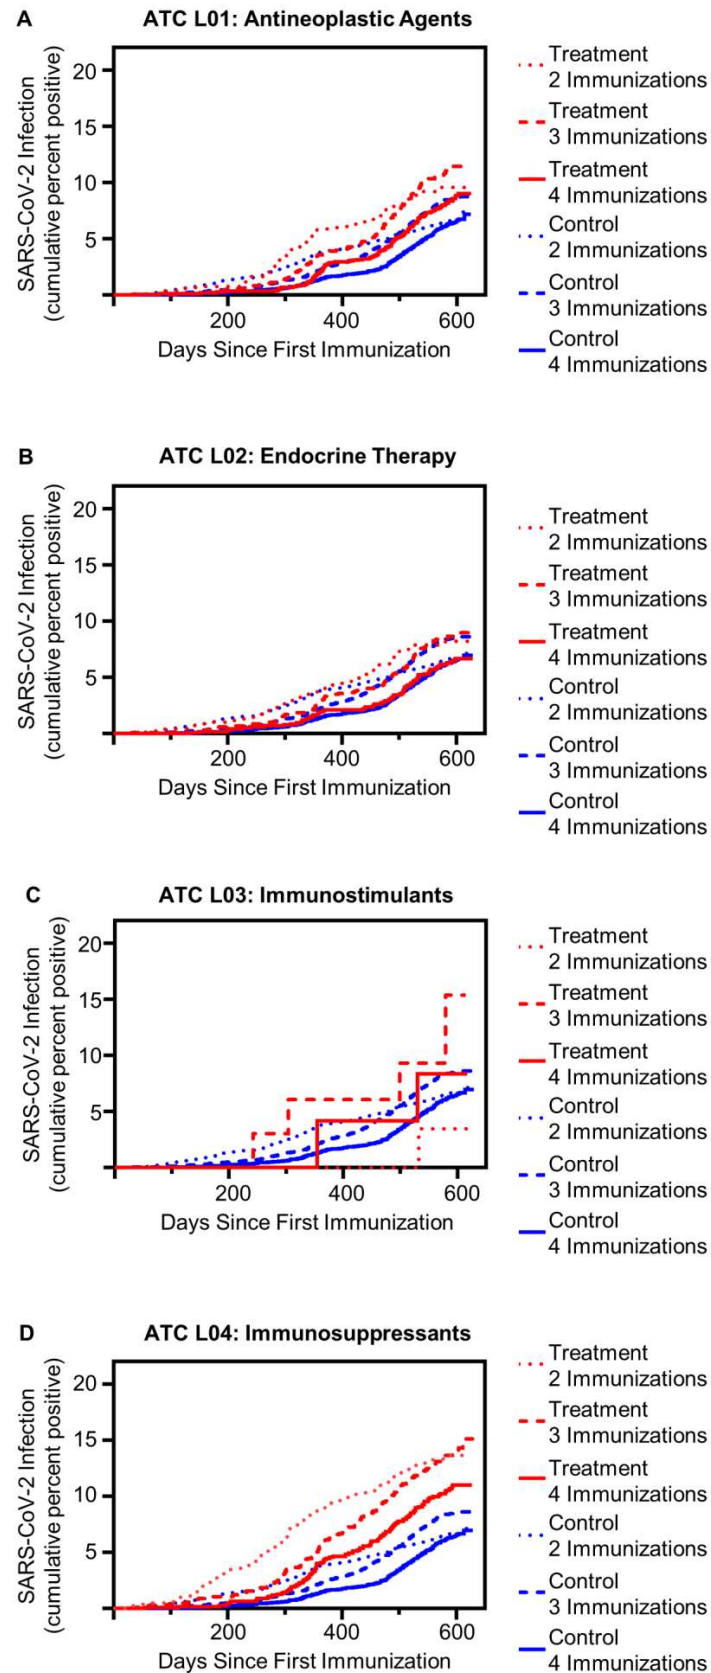



#### **Supplemental Figure 4. The effectiveness of multiple immunizations in reducing risk of SARS-CoV-2 infection after immunization varies by antineoplastic and immunomodulating class.**

(A) Effect of multiple immunizations on SARS-CoV-2 infection cumulative incidence post-immunization in immunosuppressed patients prescribed L01 antineoplastic agents, patients prescribed multiple medications excluded from analysis (Immunosuppressed: 2 immunizations n=1044, 3 immunizations n=1587, 4 immunizations n=1493; Immunocompetent: 2 immunizations n=3245, 3 immunizations n=5352, 4 immunizations n=4756).

(B) Effect of multiple immunizations on SARS-CoV-2 infection cumulative incidence post-immunization in immunosuppressed patients prescribed L02 endocrine therapy, patients prescribed multiple medications excluded from analysis (Immunosuppressed: 2 immunizations n=683, 3 immunizations n=1178, 4 immunizations n=1138; Immunocompetent: 2 immunizations n=3245, 3 immunizations n=5352, 4 immunizations n=4756).

(C) Effect of multiple immunizations on SARS-CoV-2 infection cumulative incidence post-immunization in immunosuppressed patients prescribed L03 Immunostimulants, patients prescribed multiple medications excluded from analysis (Immunosuppressed: 2 immunizations n=37, 3 immunizations n=33, 4 immunizations n=34; Immunocompetent: 2 immunizations n=3245, 3 immunizations n=5352, 4 immunizations n=4756).

(D) Effect of multiple immunizations on SARS-CoV-2 infection cumulative incidence post-immunization in immunosuppressed patients prescribed L04 Immunosuppressants, patients prescribed multiple medications excluded from analysis (Immunosuppressed: 2 immunizations n=808, 3 immunizations n=1233, 4 immunizations n=1099; Immunocompetent: 2 immunizations n=3245, 3 immunizations n=5352, 4 immunizations n=4756).

**Supplemental Figure 5**

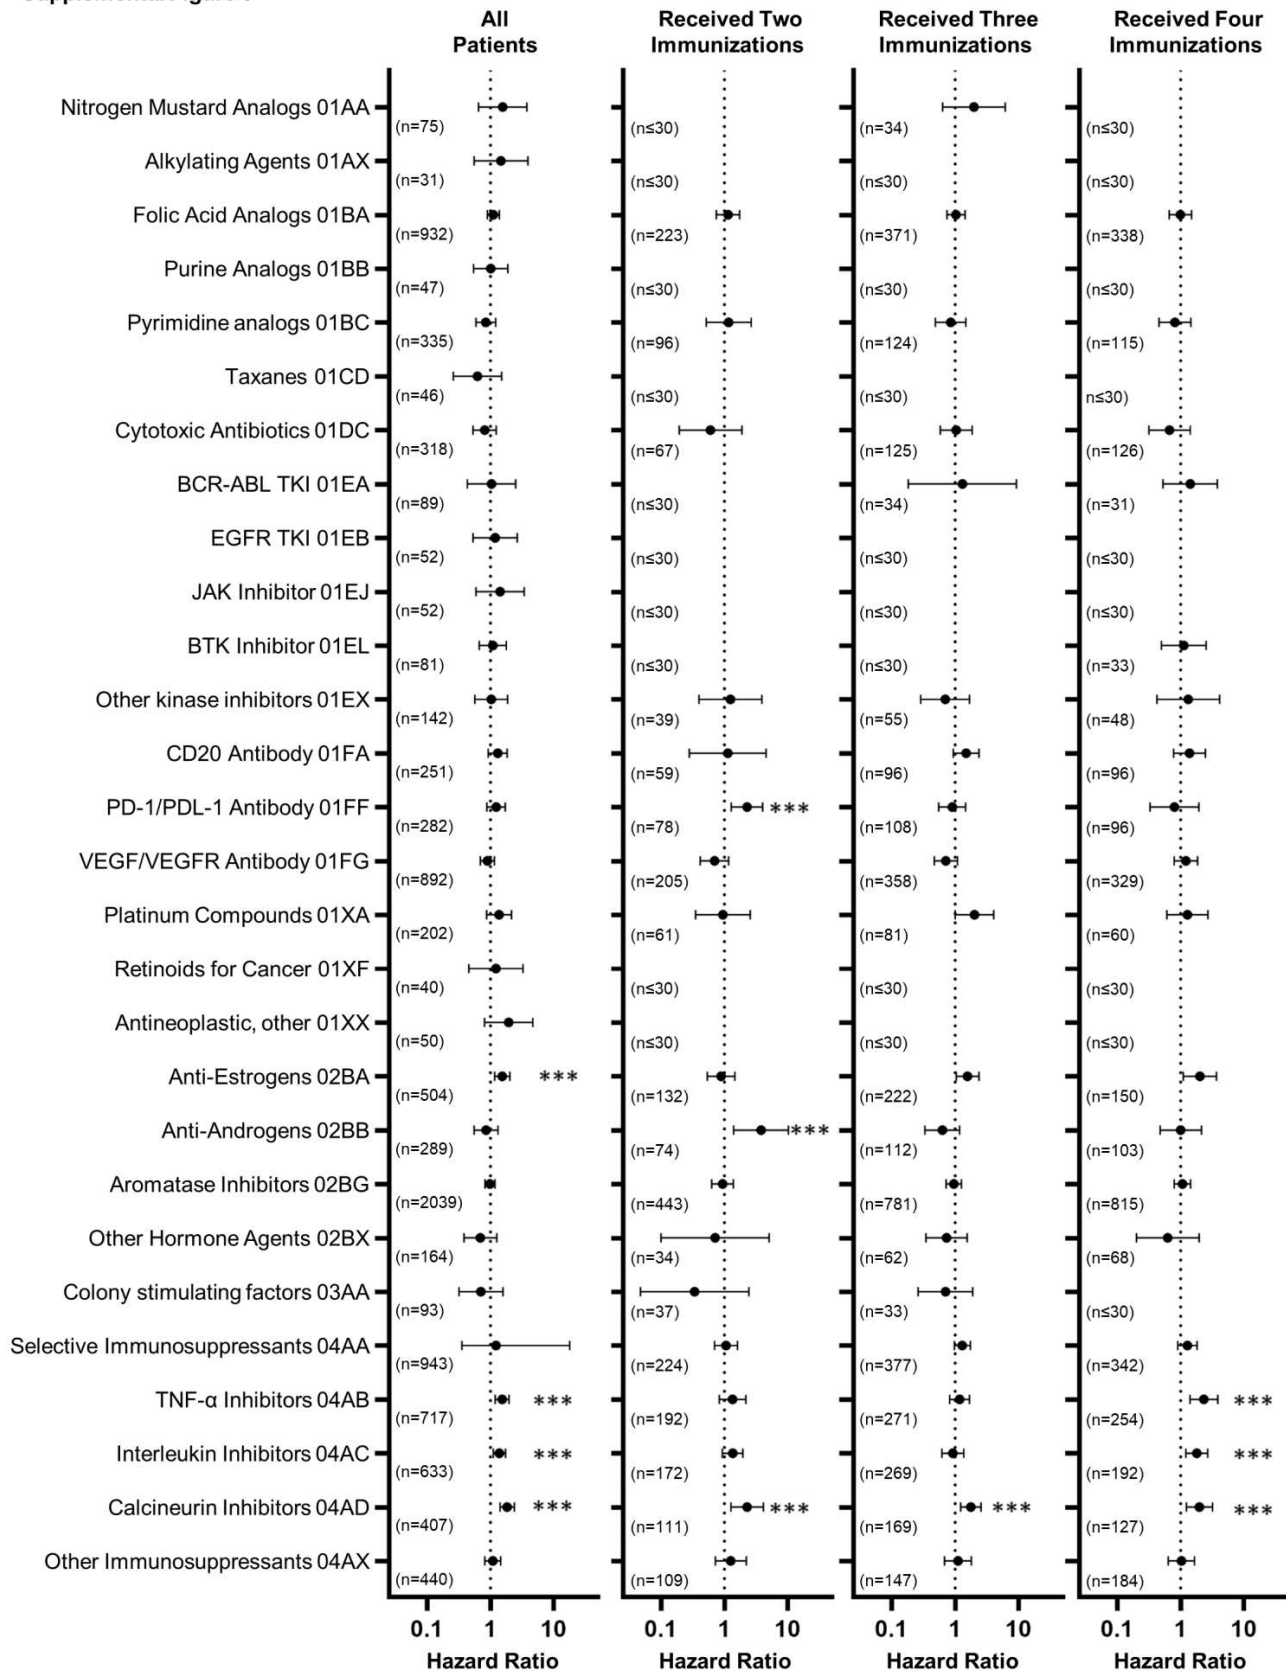

**Supplemental Figure 5. Subcategories of antineoplastic and immunomodulating agents demonstrate therapeutic class effect on risk of post-immunization SARS-CoV-2 infection.**

Forest plot demonstrating therapeutic subcategory effects by hazard ratio of post-immunization SARS-CoV-2 infection relative to immunocompetent cohort with matched immunizations. Subcategories with less than 30 patients in immunosuppressed cohort excluded from analysis. \*\*\* $p < 0.001$ .

**Supplemental Figure 6**

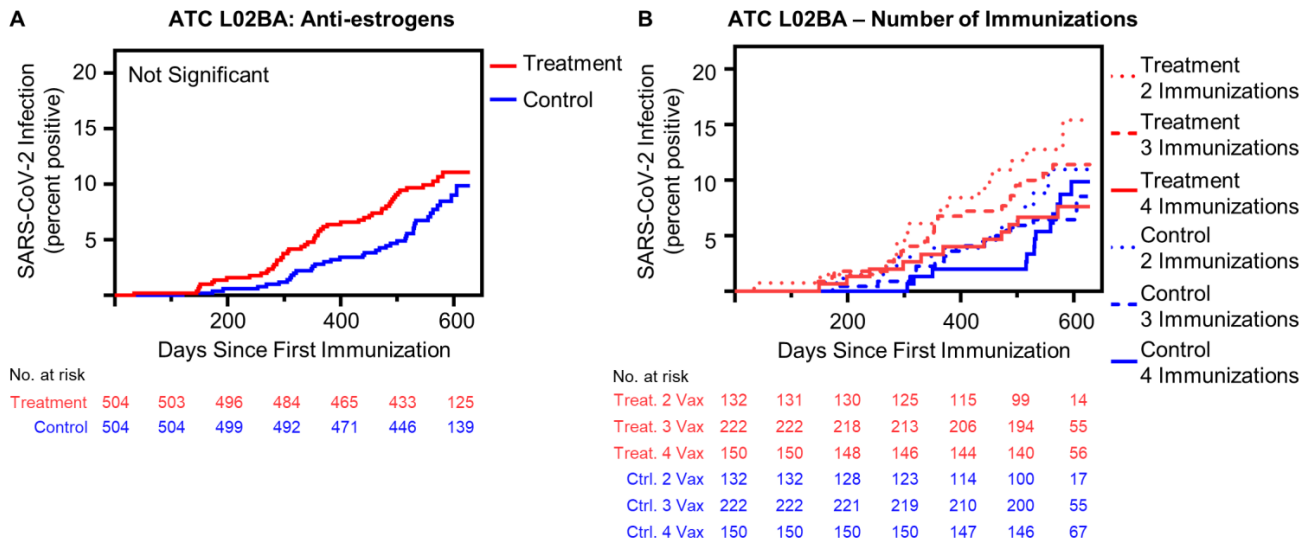

### **Supplemental Figure 6. Anti-estrogens are not associated with increased risk of post-immunization SARS-CoV-2 infection**

(A) Cumulative incidence of SARS-CoV-2 infection following initial immunization in all patients prescribed L02BA anti-estrogens (n=504) compared to matched control patients (n=504) (p>0.05 by Log-rank).

(B) Effect of multiple immunizations on SARS-CoV-2 infection cumulative incidence following initial immunization in patients prescribed L02BA anti-estrogens compared to matched control patients (Immunosuppressed: 2 immunizations n=132, 3 immunizations n=222, 4 immunizations n=150; Immunocompetent: 2 immunizations n=132, 3 immunizations n=222, 4 immunizations n=150).

**Supplemental Figure 7**

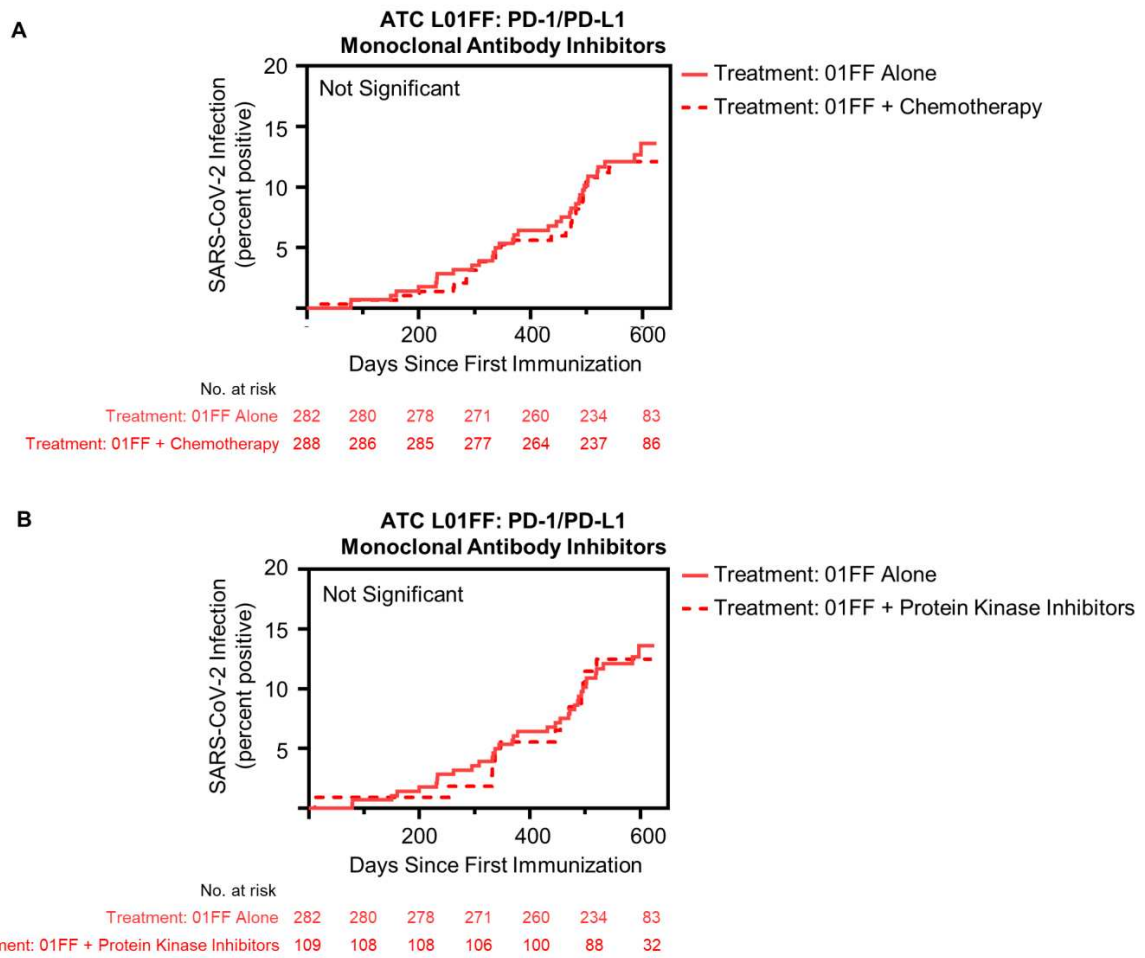

**Supplemental Figure 7. PD-1/PD-L1 monoclonal antibody and combination therapy effects on SARS-CoV-2 infection risk post-immunization.**

(A) Cumulative incidence of SARS-CoV-2 infection following initial immunization in patients prescribed L01FF as a single therapy or in combination with chemotherapy (defined as the combined categories of L01A, L01B, L01C and L01D) ( $p > 0.05$  by Log-rank).

(B) Cumulative incidence of SARS-CoV-2 infection following initial immunization in patients prescribed L01FF as a single therapy or in combination with protein kinase inhibitor ( $p > 0.05$  by Log-rank).

**Supplemental Figure 8**

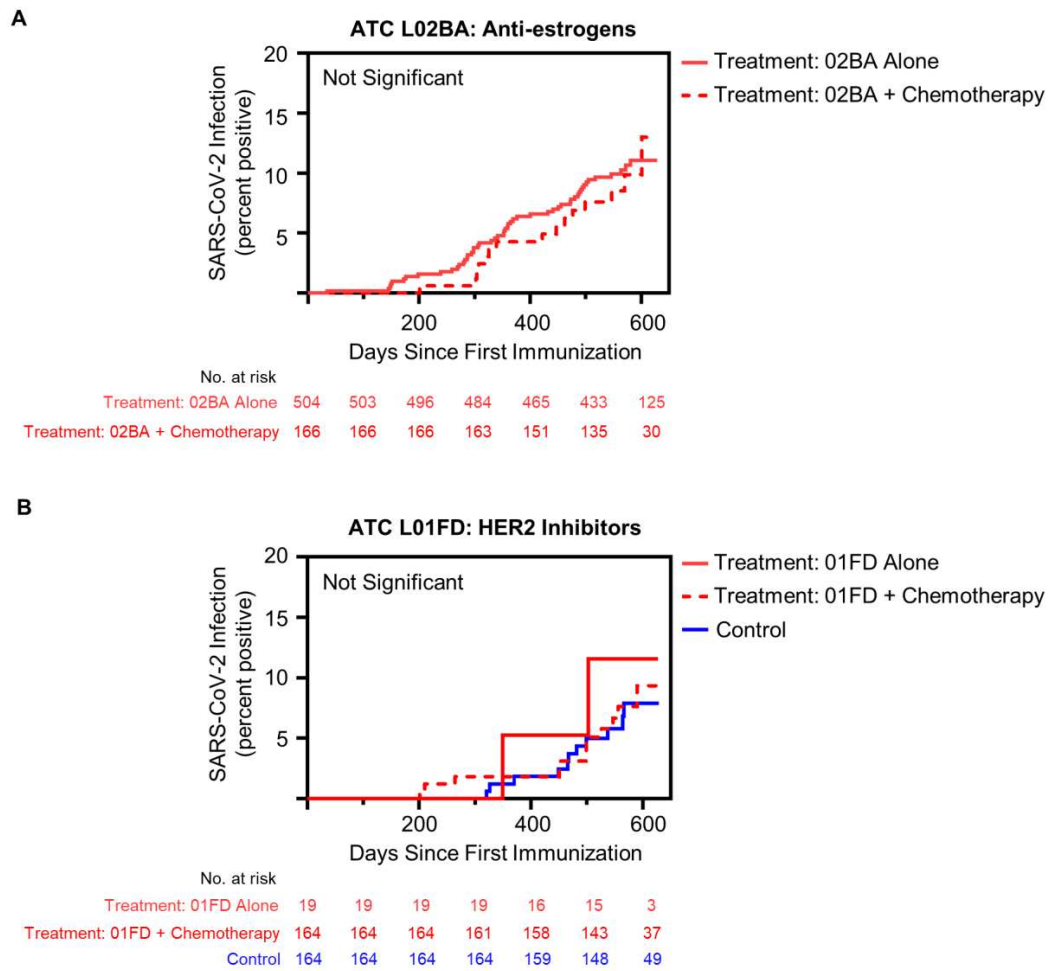



**Supplemental Figure 8. Combination of chemotherapy with anti-estrogen or HER2 therapy effects on SARS-CoV-2 infection risk post-immunization.**

(A) Cumulative incidence of SARS-CoV-2 infection following initial immunization in patients prescribed L02BA as a single therapy or in combination with chemotherapy (defined as the combined categories of L01A, L01B, L01C and L01D) ( $p > 0.05$  by Log-rank).

(B) Cumulative incidence of SARS-CoV-2 infection following initial immunization in patients prescribed 01FD as a single therapy or in combination with chemotherapy (defined as the combined categories of L01A, L01B, L01C and L01D). Control population of patients not prescribed WHO ATC L treatment medications is matched to L01FD in combination with chemotherapy ( $p > 0.05$  by Log-rank).

Supplemental Figure 9

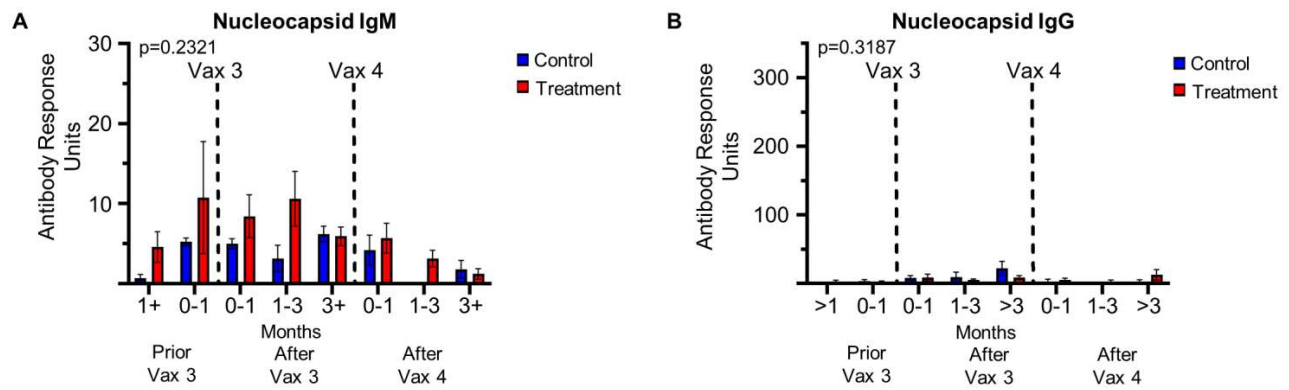

**Supplemental Figure 9. No difference observed in COVID-19 nucleocapsid antibody response.**

(A) IgM and (B) IgG antibody response to respective SARS-CoV-2 epitopes at time points following third (Vax 3) and fourth (Vax 4) COVID-19 immunization in patients prescribed antineoplastic and immunomodulating agents (Treatment) and immunocompetent patients (Control) (Immunocompetent: greater than 1 month prior to Vax 3 n=4, 0-1 month prior to Vax 3 n=9, 0-1 month following Vax 3 n=9, 1-3 months following Vax 3 n=3, greater than 3 months following Vax 3 n=17, 0-1 month following Vax 4 n=2, 1-3 months following Vax 4 n=0, greater than 3 months following Vax 4 n=4; Immunosuppressed: greater than 1 month prior to Vax 3 n=5, 0-1 month prior to Vax 3 n=18, 0-1 month following Vax 3 n=20, 1-3 months following Vax 3 n=19, greater than 3 months following Vax 3 n=36, 0-1 month following Vax 4 n=28, 1-3 months following Vax 4 n=17, greater than 3 months following Vax 4 n=27). Dashed lines indicate Vax 3 and Vax 4. Antibody response reported as antibody response units. Not significant indicates  $p>0.05$  by ANOVA.

## Supplemental Figure 10

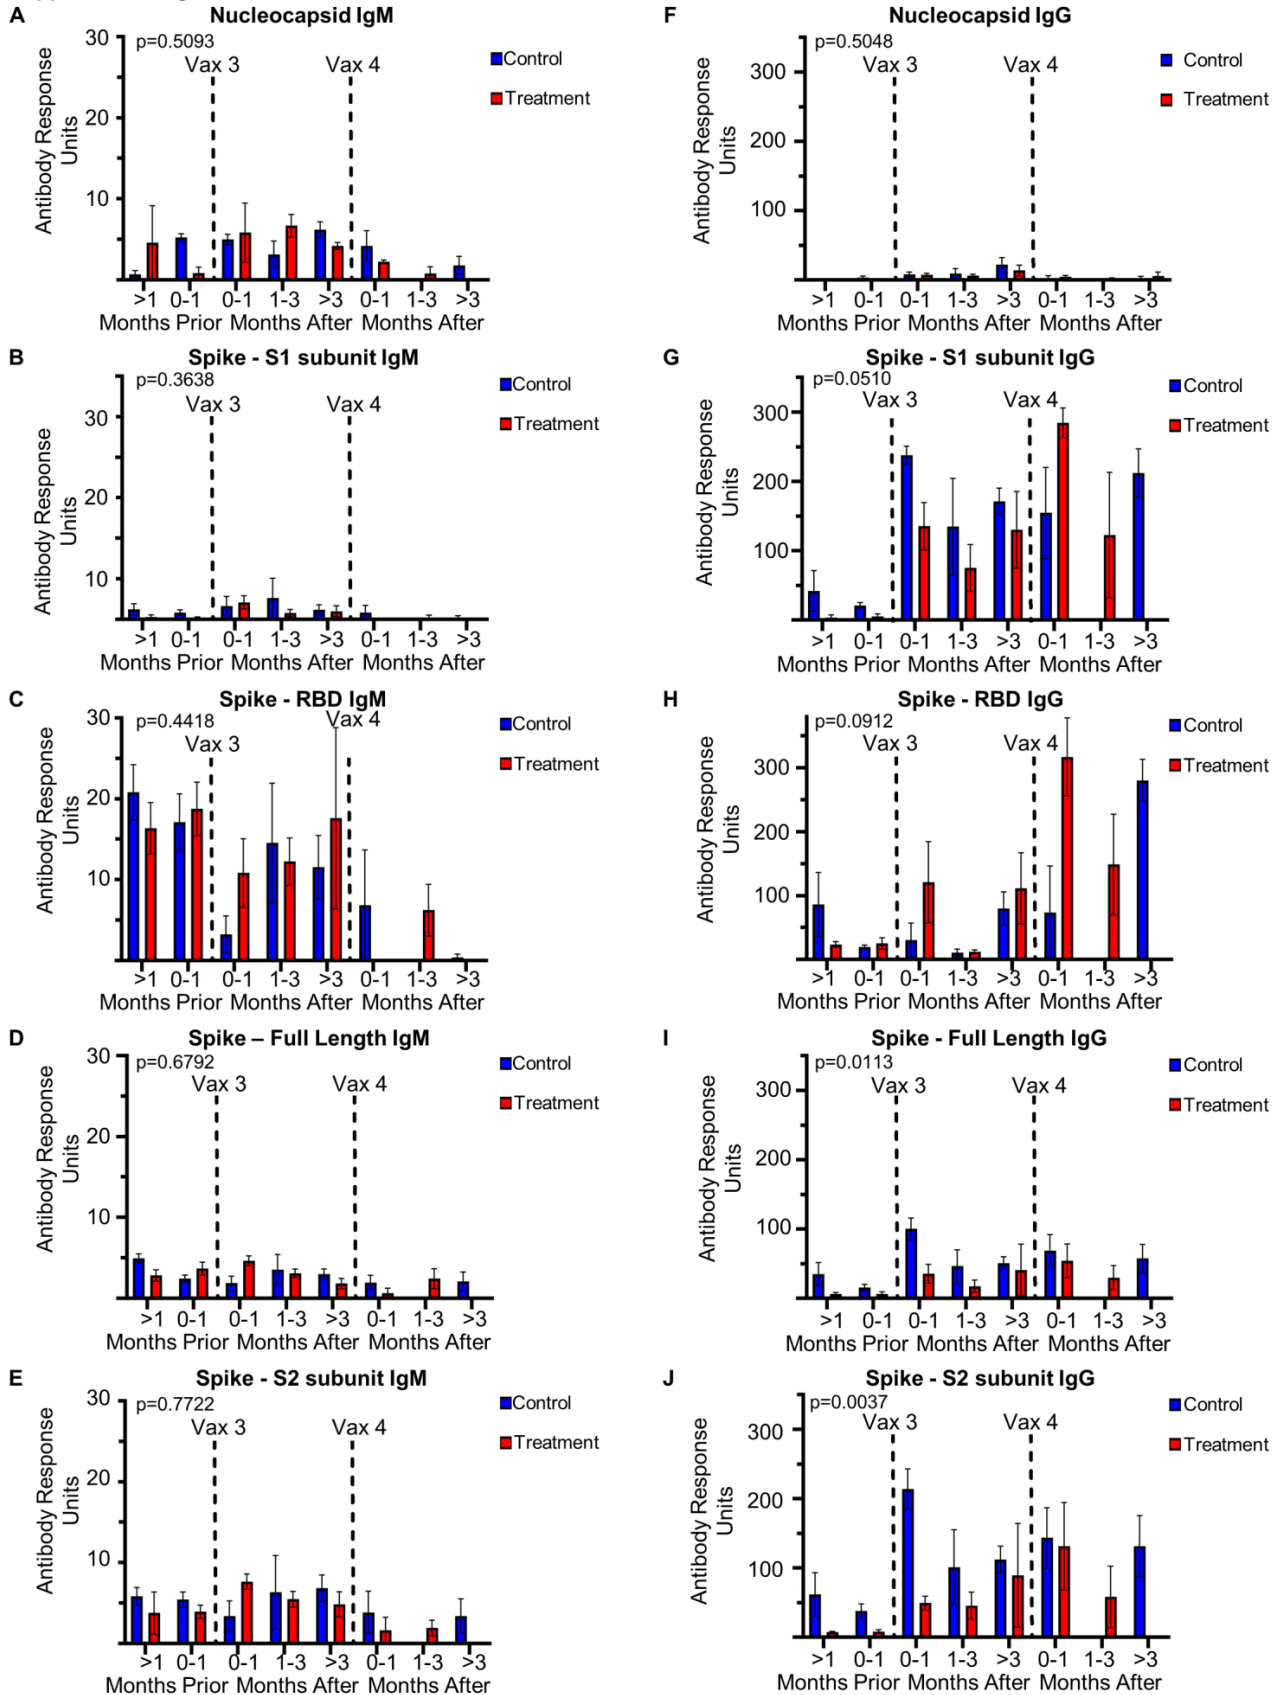

## Supplemental Figure 10. Calcineurin inhibitors impair immunoglobulin class switching to SARS-CoV-2 Spike subunits.

Antibody response to respective SARS-CoV-2 epitopes at time points following third (Vax 3) and fourth (Vax 4) COVID-19 immunization in patients prescribed calcineurin inhibitors and immunocompetent patients (Immunocompetent: greater than 1 month prior to Vax 3 n=4, 0-1 month prior to Vax 3 n=9, 0-1 month following Vax 3 n=9, 1-3 months following Vax 3 n=3, greater than 3 months following Vax 3 n=17, 0-1 month following Vax 4 n=2, 1-3 months following Vax 4 n=0, greater than 3 months following Vax 4 n=4; Immunosuppressed: greater than 1 month prior to Vax 3 n=2, 0-1 month prior to Vax 3 n=5, 0-1 month following Vax 3 n=5, 1-3 months following Vax 3 n=6, greater than 3 months following Vax 3 n=5, 0-1 month following Vax 4 n=2, 1-3 months following Vax 4 n=3, greater than 3 months following Vax 4 n=0). Antibody response reported as antibody response units. Not significant indicates  $p>0.05$  by ANOVA.

- (A) IgM antibody response to nucleocapsid epitope
- (B) IgM antibody response to Spike S1 subunit epitope
- (C) IgM antibody response to Spike S1 RBD epitope
- (D) IgM antibody response to Spike full length epitope
- (E) IgM antibody response to Spike S2 subunit epitope
- (F) IgG antibody response to nucleocapsid epitope
- (G) IgG antibody response to Spike S1 subunit epitope
- (H) IgG antibody response to Spike S1 RBD epitope
- (I) IgG antibody response to Spike full length epitope
- (J) IgG antibody response to Spike S2 subunit epitope

**Supplemental Table 1. Multiple immunizations reduce risk of post-immunization SARS-CoV-2 infection**

| <b>Characteristic</b>      | <b>N (SARS-CoV-2 Positive/<br/>Total Patients)</b> | <b>HR (95% CI)</b> | <b>p-value</b> |
|----------------------------|----------------------------------------------------|--------------------|----------------|
| Matched Control Patients   |                                                    |                    |                |
| 2 Immunizations            | 193/3245                                           | 2.36 (1.97 – 2.83) | <0.001         |
| 3 Immunizations            | 417/5352                                           | 1.42 (1.22 – 1.65) | <0.001         |
| 4 Immunizations            | 297/4765                                           | 1 [Reference]      | [Reference]    |
| WHO ATC L-Treated Patients |                                                    |                    |                |
| 2 Immunizations            | 335/3333                                           | 2.76 (2.36 – 3.24) | <0.001         |
| 3 Immunizations            | 569/5174                                           | 1.55 (1.35 – 1.79) | <0.001         |
| 4 Immunizations            | 430/4855                                           | 1.23 (1.06 – 1.43) | 0.006          |

**Supplemental Table 2. Treated patients remain at increased risk of post-immunization SARS-CoV-2 infection regardless of vaccine manufacturer.**

| <b>Characteristic</b>      | <b>N (SARS-CoV-2 Positive/<br/>Total Patients)</b> | <b>HR (95% CI)</b> | <b>p-value</b> |
|----------------------------|----------------------------------------------------|--------------------|----------------|
| Matched Control Patients   |                                                    |                    |                |
| Moderna                    | 432/6941                                           | 1 [Reference]      | [Reference]    |
| Pfizer                     | 445/6104                                           | 1.24 (1.09 – 1.42) | 0.0013         |
| Mixed                      | 22/231                                             | 1.82 (1.18 – 2.79) | 0.0063         |
| Other                      | 8/86                                               | 1.84 (0.91 – 3.71) | 0.0868         |
| WHO ATC L-Treated Patients |                                                    |                    |                |
| Moderna                    | 642/6852                                           | 1.54 (1.37 – 1.74) | <0.001         |
| Pfizer                     | 651/6145                                           | 1.85 (1.64 – 2.09) | <0.001         |
| Mixed                      | 32/265                                             | 2.33 (1.63 – 3.34) | <0.001         |
| Other                      | 9/100                                              | 1.76 (0.91 – 3.40) | 0.0941         |

### Supplemental Table 3. Multiple immunizations reduce risk of post-immunization SARS-CoV-2 infection in patients who received antineoplastic or immunosuppressing medications

| Characteristic                      | N (SARS-CoV-2 Positive/<br>Total Patients) | HR (95% CI)        | p-value     |
|-------------------------------------|--------------------------------------------|--------------------|-------------|
| <b>L01 Antineoplastic Agents</b>    |                                            |                    |             |
| Matched Control Patients            |                                            |                    |             |
| 2 Immunizations                     | 193/3245                                   | 2.43 (2.02 – 2.91) | <0.001      |
| 3 Immunizations                     | 417/5352                                   | 1.45 (1.25 – 1.69) | <0.001      |
| 4 Immunizations                     | 297/4765                                   | 1 [Reference]      | [Reference] |
| L01-Treated Patients                |                                            |                    |             |
| 2 Immunizations                     | 91/1044                                    | 2.76 (2.18 – 3.51) | <0.001      |
| 3 Immunizations                     | 168/1587                                   | 1.45 (1.20 – 1.75) | <0.001      |
| 4 Immunizations                     | 125/1493                                   | 1.09 (0.89 – 1.35) | 0.006       |
| <b>L04 Immunosuppressant Agents</b> |                                            |                    |             |
| Matched Control Patients            |                                            |                    |             |
| 2 Immunizations                     | 193/3245                                   | 2.36 (1.97 – 2.84) | <0.001      |
| 3 Immunizations                     | 417/5352                                   | 1.42 (1.22 – 1.65) | <0.001      |
| 4 Immunizations                     | 297/4765                                   | 1 [Reference]      | [Reference] |
| L04-Treated Patients                |                                            |                    |             |
| 2 Immunizations                     | 100/808                                    | 3.32 (2.64 – 4.18) | <0.001      |
| 3 Immunizations                     | 159/1233                                   | 1.72 (1.42 – 2.10) | <0.001      |
| 4 Immunizations                     | 115/1099                                   | 1.43 (1.15 – 1.77) | 0.0012      |



**Supplemental Table 4. Baseline demographics of matched L01FA: CD20 monoclonal antibody inhibitors**

| Characteristic                         | Matched Control<br>(n=251) | Treated Patients<br>(n=251) |
|----------------------------------------|----------------------------|-----------------------------|
| Age – Median (IQR) - years             | 66.1 (51.0 – 81.3)         | 66.6 (51.3 – 81.9)          |
| BMI – Median (IQR) – kg/m <sup>2</sup> | 27.0 (21.8 – 32.1)         | 27.3 (20.9 – 33.68)         |
| Sex – no. (%)                          |                            |                             |
| Male                                   | 86 (34.3)                  | 97 (38.6)                   |
| Female                                 | 165 (65.7)                 | 154 (61.4)                  |
| Race – no. (%)                         |                            |                             |
| White                                  | 204 (81.3)                 | 205 (81.7)                  |
| Asian                                  | 12 (4.8)                   | 14 (5.6)                    |
| African American/Black                 | 7 (2.8)                    | 5 (2.0)                     |
| Native Hawaiian/Pacific Islander       | 1 (0.4)                    | 1 (0.4)                     |
| American Indian/Native American        | 0 (0.0)                    | 1 (0.4)                     |
| Other/Unknown                          | 27 (10.8)                  | 25 (10.0)                   |
| Ethnicity – no. (%)                    |                            |                             |
| Hispanic/Latino                        | 35 (13.9)                  | 34 (13.5)                   |
| Not Hispanic/Latino                    | 215 (85.7)                 | 212 (84.5)                  |
| Other/Unknown                          | 1 (0.4)                    | 5 (2.0)                     |
| Immunizations Received – no. (%)       |                            |                             |
| 2                                      | 58 (23.1)                  | 59 (23.5)                   |
| 3                                      | 103 (41.0)                 | 96 (38.2)                   |
| 4                                      | 90 (35.9)                  | 96 (38.2)                   |
| Vaccination 1 Manufacturer – no. (%)   |                            |                             |
| Pfizer-BioNTech                        | 114 (45.4)                 | 121 (48.2)                  |
| Moderna                                | 136 (54.2)                 | 122 (48.6)                  |
| Janssen                                | 1 (0.4)                    | 8 (3.2)                     |
| Vaccination 2 Manufacturer – no. (%)   |                            |                             |
| Pfizer-BioNTech                        | 116 (46.2)                 | 125 (49.8)                  |
| Moderna                                | 134 (53.4)                 | 123 (49.0)                  |
| Janssen                                | 1 (0.4)                    | 3 (1.2)                     |
| Vaccination 3 Manufacturer – no. (%)   |                            |                             |
| Pfizer-BioNTech                        | 86 (34.3)                  | 99 (39.4)                   |
| Moderna                                | 107 (42.6)                 | 93 (37.1)                   |
| Janssen                                | 0 (0.0)                    | 0 (0.0)                     |
| None                                   | 58 (23.1)                  | 59 (23.5)                   |
| Vaccination 4 Manufacturer – no. (%)   |                            |                             |
| Pfizer-BioNTech                        | 38 (15.1)                  | 42 (16.7)                   |
| Moderna                                | 52 (20.7)                  | 54 (21.5)                   |
| None                                   | 161 (64.1)                 | 155 (61.8)                  |

**Supplemental Table 5. Baseline demographics of matched L01FF: PD-1/PDL-1 inhibiting monoclonal antibody**

| <b>Characteristic</b>                  | <b>Matched Control<br/>(n=282)</b> | <b>Treated Patients<br/>(n=282)</b> |
|----------------------------------------|------------------------------------|-------------------------------------|
| Age – Median (IQR) - years             | 72.6 (59.7 – 85.5)                 | 72.3 (60.3 – 84.3)                  |
| BMI – Median (IQR) – kg/m <sup>2</sup> | 27.6 (22.5 – 32.7)                 | 27.3 (22.5 – 32.1)                  |
| Sex – no. (%)                          |                                    |                                     |
| Male                                   | 179 (63.5)                         | 172 (61.0)                          |
| Female                                 | 103 (36.5)                         | 110 (39.0)                          |
| Race – no. (%)                         |                                    |                                     |
| White                                  | 253 (89.7)                         | 243 (86.2)                          |
| Asian                                  | 15 (5.3)                           | 18 (6.4)                            |
| African American/Black                 | 3 (1.1)                            | 3 (1.1)                             |
| Native Hawaiian/Pacific Islander       | 1 (0.4)                            | 2 (0.7)                             |
| American Indian/Native American        | 0 (0.0)                            | 0 (0.0)                             |
| Other/Unknown                          | 10 (3.6)                           | 16 (5.7)                            |
| Ethnicity – no. (%)                    |                                    |                                     |
| Hispanic/Latino                        | 21 (7.5)                           | 23 (8.2)                            |
| Not Hispanic/Latino                    | 258 (91.5)                         | 251 (89.1)                          |
| Other/Unknown                          | 3 (1.1)                            | 8 (2.8)                             |
| Immunizations Received – no. (%)       |                                    |                                     |
| 2                                      | 66 (23.4)                          | 78 (27.7)                           |
| 3                                      | 119 (42.2)                         | 108 (38.3)                          |
| 4                                      | 97 (34.4)                          | 96 (34.0)                           |
| Vaccination 1 Manufacturer – no. (%)   |                                    |                                     |
| Pfizer-BioNTech                        | 117 (41.5)                         | 133 (47.2)                          |
| Moderna                                | 164 (58.2)                         | 142 (50.4)                          |
| Janssen                                | 1 (0.4)                            | 7 (2.5)                             |
| Vaccination 2 Manufacturer – no. (%)   |                                    |                                     |
| Pfizer-BioNTech                        | 118 (41.8)                         | 134 (47.5)                          |
| Moderna                                | 162 (57.5)                         | 144 (51.1)                          |
| Janssen                                | 2 (0.7)                            | 4 (1.4)                             |
| Vaccination 3 Manufacturer – no. (%)   |                                    |                                     |
| Pfizer-BioNTech                        | 91 (32.3)                          | 99 (35.1)                           |
| Moderna                                | 124 (44.0)                         | 105 (37.2)                          |
| Janssen                                | 1 (0.4)                            | 0 (0.0)                             |
| None                                   | 66 (23.4)                          | 78 (27.7)                           |
| Vaccination 4 Manufacturer – no. (%)   |                                    |                                     |
| Pfizer-BioNTech                        | 43 (15.3)                          | 46 (16.3)                           |
| Moderna                                | 54 (19.1)                          | 50 (17.7)                           |
| None                                   | 185 (65.6)                         | 186 (66.0)                          |

**Supplemental Table 6. Baseline demographics of matched L02BA: anti-estrogens**

| Characteristic                         | Matched Controls<br>(n=504) | Treated Patients<br>(n=504) |
|----------------------------------------|-----------------------------|-----------------------------|
| Age – Median (IQR) - years             | 59.5 (42.9 – 76.1)          | 60.8 (45.8 – 75.8)          |
| BMI – Median (IQR) – kg/m <sup>2</sup> | 25.4 (20.8 – 30.0)          | 25.6 (20.0 – 31.2)          |
| Sex – no. (%)                          |                             |                             |
| Male                                   | 28 (5.6)                    | 28 (5.6)                    |
| Female                                 | 476 (94.4)                  | 476 (94.4)                  |
| Race – no. (%)                         |                             |                             |
| White                                  | 385 (76.4)                  | 376 (74.6)                  |
| Asian                                  | 67 (13.3)                   | 79 (15.7)                   |
| African American/Black                 | 15 (3.0)                    | 11 (2.2)                    |
| Native Hawaiian/Pacific Islander       | 0 (0.0)                     | 1 (0.2)                     |
| American Indian/Native American        | 0 (0.0)                     | 1 (0.2)                     |
| Other/Unknown                          | 37 (7.3)                    | 36 (7.1)                    |
| Ethnicity – no. (%)                    |                             |                             |
| Hispanic/Latino                        | 38 (7.5)                    | 47 (9.3)                    |
| Not Hispanic/Latino                    | 458 (90.9)                  | 446 (88.5)                  |
| Other/Unknown                          | 8 (1.6)                     | 11 (2.2)                    |
| Immunizations Received – no. (%)       |                             |                             |
| 2                                      | 132 (26.2)                  | 132 (26.2)                  |
| 3                                      | 222 (44.1)                  | 222 (44.1)                  |
| 4                                      | 150 (29.8)                  | 150 (29.8)                  |
| Vaccination 1 Manufacturer – no. (%)   |                             |                             |
| Pfizer-BioNTech                        | 244 (48.4)                  | 262 (52.0)                  |
| Moderna                                | 249 (49.4)                  | 231 (45.8)                  |
| Janssen                                | 11 (2.2)                    | 11 (2.2)                    |
| Vaccination 2 Manufacturer – no. (%)   |                             |                             |
| Pfizer-BioNTech                        | 246 (48.8)                  | 265 (52.6)                  |
| Moderna                                | 252 (50.0)                  | 235 (46.6)                  |
| Janssen                                | 6 (1.2)                     | 4 (0.8)                     |
| Vaccination 3 Manufacturer – no. (%)   |                             |                             |
| Pfizer-BioNTech                        | 167 (33.1)                  | 189 (37.5)                  |
| Moderna                                | 203 (40.3)                  | 182 (36.1)                  |
| Janssen                                | 2 (0.4)                     | 1 (0.2)                     |
| None                                   | 132 (26.2)                  | 132 (26.2)                  |
| Vaccination 4 Manufacturer – no. (%)   |                             |                             |
| Pfizer-BioNTech                        | 64 (12.7)                   | 79 (15.7)                   |
| Moderna                                | 86 (17.1)                   | 71 (14.1)                   |
| None                                   | 354 (70.2)                  | 354 (70.2)                  |

**Supplemental Table 7. Baseline demographics of matched L04AD: calcineurin inhibitors**

| <b>Characteristic</b>                  | <b>Matched Controls<br/>(n=407)</b> | <b>Immunosuppressed<br/>(n=407)</b> |
|----------------------------------------|-------------------------------------|-------------------------------------|
| Age – Median (IQR) - years             | 61.5 (45.8 – 77.2)                  | 59.3 (45.1 – 73.5)                  |
| BMI – Median (IQR) – kg/m <sup>2</sup> | 27.6 (22.0 – 33.2)                  | 27.4 (21.7 – 33.1)                  |
| Sex – no. (%)                          |                                     |                                     |
| Male                                   | 234 (57.5)                          | 227 (55.8)                          |
| Female                                 | 173 (42.5)                          | 180 (44.2)                          |
| Race – no. (%)                         |                                     |                                     |
| White                                  | 303 (74.5)                          | 294 (72.2)                          |
| Asian                                  | 44 (10.8)                           | 47 (11.6)                           |
| African American/Black                 | 16 (3.9)                            | 17 (4.2)                            |
| Native Hawaiian/Pacific Islander       | 2 (0.5)                             | 2 (0.5)                             |
| American Indian/Native American        | 2 (0.5)                             | 2 (0.5)                             |
| Other/Unknown                          | 40 (9.8)                            | 45 (11.1)                           |
| Ethnicity – no. (%)                    |                                     |                                     |
| Hispanic/Latino                        | 102 (25.1)                          | 114 (28.0)                          |
| Not Hispanic/Latino                    | 303 (74.5)                          | 288 (70.8)                          |
| Other/Unknown                          | 2 (0.5)                             | 5 (1.2)                             |
| Immunizations Received – no. (%)       |                                     |                                     |
| 2                                      | 101 (24.8)                          | 111 (27.3)                          |
| 3                                      | 179 (44.0)                          | 169 (41.5)                          |
| 4                                      | 127 (31.2)                          | 127 (31.2)                          |
| Vaccination 1 Manufacturer – no. (%)   |                                     |                                     |
| Pfizer-BioNTech                        | 180 (44.2)                          | 171 (42.1)                          |
| Moderna                                | 217 (53.3)                          | 223 (54.8)                          |
| Janssen                                | 10 (2.5)                            | 13 (3.2)                            |
| Vaccination 2 Manufacturer – no. (%)   |                                     |                                     |
| Pfizer-BioNTech                        | 182 (44.7)                          | 170 (41.8)                          |
| Moderna                                | 222 (54.6)                          | 235 (57.7)                          |
| Janssen                                | 3 (0.7)                             | 2 (0.5)                             |
| Vaccination 3 Manufacturer – no. (%)   |                                     |                                     |
| Pfizer-BioNTech                        | 138 (33.9)                          | 118 (27.3)                          |
| Moderna                                | 167 (41.0)                          | 177 (43.5)                          |
| Janssen                                | 1 (0.3)                             | 1 (0.3)                             |
| None                                   | 101 (24.8)                          | 111 (27.3)                          |
| Vaccination 4 Manufacturer – no. (%)   |                                     |                                     |
| Pfizer-BioNTech                        | 54 (13.3)                           | 44 (10.8)                           |
| Moderna                                | 73 (17.9)                           | 83 (20.4)                           |
| None                                   | 280 (68.8)                          | 280 (68.8)                          |

**Supplemental Table 8. Multiple immunizations reduce risk conferred by L01FA: CD20 inhibiting monoclonal antibody**

| <b>Characteristic</b> | <b>N (SARS-CoV-2 Positive/<br/>Total Patients)</b> | <b>HR (95% CI)</b>  | <b>p-value</b> |
|-----------------------|----------------------------------------------------|---------------------|----------------|
| Control Patients      |                                                    |                     |                |
| 2 Immunizations       | 3/58                                               | 3.11 (0.70 – 13.90) | 0.137          |
| 3 Immunizations       | 8/95                                               | 1.08 (0.34 – 3.37)  | 0.900          |
| 4 Immunizations       | 5/85                                               | 1 [Reference]       | [Reference]    |
| Treated Patients      |                                                    |                     |                |
| 2 Immunizations       | 2/57                                               | 2.86 (0.53 – 15.50) | 0.224          |
| 3 Immunizations       | 19/77                                              | 1.83 (0.65 – 5.14)  | 0.249          |
| 4 Immunizations       | 12/84                                              | 1.19 (0.41 – 3.47)  | 0.738          |

**Supplemental Table 9. Multiple immunizations reduce risk conferred by L01FF: PD-1/PDL-1 inhibiting monoclonal antibody**

| <b>Characteristic</b>    | <b>N (SARS-CoV-2 Positive/<br/>Total Patients)</b> | <b>HR (95% CI)</b>    | <b>p-value</b> |
|--------------------------|----------------------------------------------------|-----------------------|----------------|
| Matched Control Patients |                                                    |                       |                |
| 2 Immunizations          | 5/61                                               | 13.0 (1.28 – 132.17)  | 0.0299         |
| 3 Immunizations          | 10/109                                             | 0.57 (0.07 – 4.60)    | 0.5977         |
| 4 Immunizations          | 1/96                                               | 1 [Reference]         | [Reference]    |
| Treated Patients         |                                                    |                       |                |
| 2 Immunizations          | 13/65                                              | 11.65 (1.33 – 102.21) | 0.0267         |
| 3 Immunizations          | 17/91                                              | 0.88 (0.11 – 6.83)    | 0.9035         |
| 4 Immunizations          | 5/91                                               | 0.48 (0.05 – 4.50)    | 0.5192         |

**Supplemental Table 10. Multiple immunizations do not reduce risk conferred by L04AD: calcineurin inhibitors**

| <b>Characteristic</b>    | <b>N (SARS-CoV-2 Positive/<br/>Total Patients)</b> | <b>HR (95% CI)</b> | <b>p-value</b> |
|--------------------------|----------------------------------------------------|--------------------|----------------|
| Matched Control Patients |                                                    |                    |                |
| 2 Immunizations          | 7/101                                              | 2.33 (1.03 – 5.30) | 0.0422         |
| 3 Immunizations          | 12/179                                             | 2.04 (0.95 – 4.41) | 0.0692         |
| 4 Immunizations          | 5/127                                              | 1 [Reference]      | [Reference]    |
| Treated Patients         |                                                    |                    |                |
| 2 Immunizations          | 12/111                                             | 2.79 (1.33 – 5.85) | 0.0065         |
| 3 Immunizations          | 31/169                                             | 2.89 (1.43 – 5.81) | 0.0029         |
| 4 Immunizations          | 18/127                                             | 2.51 (1.11 – 5.67) | 0.0276         |

**Supplemental Table 11. Baseline Demographics of Serial Serologic Samples**

| Characteristic                                  | Controls<br>(n=19) | WHO ATC L-Treated Patients<br>(n=68) |
|-------------------------------------------------|--------------------|--------------------------------------|
| Age – Median (IQR) - years                      | 36.5 (30.0 – 53.3) | 64.5 (57.5 – 68.0)                   |
| BMI – Median (IQR) – kg/m <sup>2</sup>          | 24.2 (21.9 – 26.0) | 26.9 (22.4 – 31.9)                   |
| Sex – no. (%)                                   |                    |                                      |
| Male                                            | 10 (52.6)          | 25 (36.8)                            |
| Female                                          | 9 (47.4)           | 43 (63.2)                            |
| Other                                           | 0 (0.0)            | 0 (0.0)                              |
| Race – no. (%)                                  |                    |                                      |
| White                                           | 9 (47.4)           | 56 (82.4)                            |
| Asian                                           | 3 (15.8)           | 3 (4.4)                              |
| African American/ Black                         | 1 (5.3)            | 3 (4.4)                              |
| Native Hawaiian/ Pacific Islander               | 0 (0.0)            | 0 (0.0)                              |
| American Indian/ Native American                | 0 (0.0)            | 0 (0.0)                              |
| Other/Unknown                                   | 6 (31.6)           | 6 (8.8)                              |
| Ethnicity – no. (%)                             |                    |                                      |
| Hispanic/Latino                                 | 0 (0.0)            | 6 (8.8)                              |
| Not Hispanic/Latino                             | 14 (73.7)          | 60 (88.2)                            |
| Other/Unknown                                   | 5 (26.3)           | 2 (2.9)                              |
| Immunizations Received – no. (%)                |                    |                                      |
| 2                                               | 0 (0.0)            | 1 (1.5)                              |
| 3                                               | 15 (78.9)          | 18 (26.5)                            |
| 4                                               | 4 (21.1)           | 49 (72.1)                            |
| Vaccination 1 Manufacturer – no. (%)            |                    |                                      |
| Pfizer-BioNTech                                 | 17 (89.5)          | 30 (44.1)                            |
| Moderna                                         | 2 (10.5)           | 35 (51.5)                            |
| Janssen                                         | 0 (0.0)            | 3 (4.4)                              |
| AstraZeneca                                     | 0 (0.0)            | 0 (0.0)                              |
| Vaccination 2 Manufacturer – no. (%)            |                    |                                      |
| Pfizer-BioNTech                                 | 17 (89.5)          | 31 (45.6)                            |
| Moderna                                         | 2 (10.5)           | 37 (54.4)                            |
| Janssen                                         | 0 (0.0)            | 0 (0.0)                              |
| AstraZeneca                                     | 0 (0.0)            | 0 (0.0)                              |
| Vaccination 3 Manufacturer – no. (%)            |                    |                                      |
| Pfizer-BioNTech                                 | 16 (84.2)          | 30 (44.1)                            |
| Moderna                                         | 3 (15.8)           | 37 (54.4)                            |
| Janssen                                         | 0 (0.0)            | 0 (0.0)                              |
| None                                            | 0 (0.0)            | 0 (0.0)                              |
| Vaccination 4 Manufacturer – no. (%)            |                    |                                      |
| Pfizer-BioNTech                                 | 1 (5.3)            | 22 (32.4)                            |
| Moderna                                         | 3 (15.8)           | 27 (39.7)                            |
| Janssen                                         | 0 (0.0)            | 0 (0.0)                              |
| None                                            | 15 (78.9)          | 19 (27.9)                            |
| Medication Class – no. (%)                      |                    |                                      |
| L01                                             | n/a                | 22 (32.4)                            |
| L02                                             | n/a                | 27 (39.7)                            |
| L03                                             | n/a                | 0 (0.0)                              |
| L04                                             | n/a                | 19 (27.9)                            |
| Patients Prescribed Multiple Medication Classes | n/a                | 37 (54.4)                            |
